## ANESTHESIOLOGY

### ■ Doses of Rapacuronium Necessary for Good Intubation Conditions in Children. Meakin *et al.* (page 1002)

In an effort to determine the doses of rapacuronium necessary to provide satisfactory conditions for rapid tracheal intubation in infants and children, Meakin *et al.* enrolled 165 pediatric patients scheduled for elective surgery in a prospective, randomized, multicenter trial. Sixty-five of the participants were infants less than 1 yr old; 51 were younger children, 1–6 yr old; and 49 were older children, 7–12 yr old.

Anesthesia was induced with 5–8 mg/kg thiopental followed by inhalation of 66% N<sub>2</sub>O in oxygen. Neuromuscular transmission was monitored using an acceleromyograph. Researchers began train-of-four stimulation of the ulnar nerve as soon as patients were asleep; immediately after the first train-of-four response was recorded, one of five doses of rapacuronium (0.5, 1.0, 1.5, 2.0, or 2.5 mg/kg) was administered by rapid intravenous injection according to a predetermined randomization schedule. Laryngoscopy was started 45–50 s later, followed by intubation at 60 s. Intubating conditions were graded by a blinded observer.

Intubation conditions were good or excellent at 60 s in all infants after doses of 1.5 mg/kg and 2 mg/kg rapacuronium. In all younger and older children, good or excellent intubation conditions were found after doses of 2.0 mg/kg and 2.5 mg/kg. (The 2.5-mg/kg dose of rapacuronium for infants and the 0.5-mg/kg dose for younger and older children were eliminated after an interim analysis of intubation data from the first 35 patients.)

Recovery times were measured from the time of rapacuronium injection to reappearance of the third twitch of the train-of-four. Mean times to T<sub>3</sub> recovery were less than 10 min in infants at doses of 1.5 mg/kg or less and in younger and older children at doses of 2.0 mg/kg or less. Recovery of T<sub>3</sub> after 1.0 or 2.0 mg/kg rapacuronium was slower in infants compared with younger and older children. Researchers documented five adverse events, ranging from bronchospasm to tachycardia to increased salivation, all of which were related to rapacuronium administration, but none of which were serious.

The authors were able to establish that satisfactory conditions for tracheal intubation in anesthetized infants and children can be produced when giving infants doses of 1.5 mg/kg and children 2.0 mg/kg. In addition, these doses appeared to be well-tolerated and produced few adverse events.

### ■ Implicit and Explicit Memory during Emergency Cesarean Sections. Lubke *et al.* (page 1029)

In a study of 24 patients undergoing emergency cesarean sections, Lubke *et al.* used an electroencephalography-based bispectral index (BIS), recorded throughout the surgery, to measure hypnotic state during presentation of word lists to assess recall during “light” general anesthesia. For all patients, anesthesia consisted of a rapid-sequence induction with 4 mg/kg thiopental and 100 mg succinylcholine to facilitate intubation. After delivery of anesthesia, the nitrous oxide concentration was increased from 50 to 70%, with 0.2% isoflurane (end tidal) and 0.1–0.15 mg/kg morphine. Immediately after alterations of drug concentrations postdelivery, a program for word presentation was started. Two word lists of 16 words each in random order were played *via* headphones for each patient. Each word was repeated consecutively 12 times with a 2-s delay between repetitions.

As soon as patients began responding postoperatively, the research team conducted short, structured interviews regarding recall of pre-, intra- and postoperative events. After a short word stem exercise to demonstrate the test procedure, inclusion and exclusion parts of the word stem completion test were administered. Patients were asked to complete word stems, presented audibly and visually, with the corresponding word that had been played during anesthesia. If unable to recall the word from surgery, the patient was asked to fill in with the first word that came to mind (inclusion test). For the exclusion test, patients were asked to avoid words from surgery while completing word stems. This process dissociation procedure (PDP) allowed researchers to separate explicit memory from implicit memory.

The mean bispectral index during word presentation was 76.3. None of the patients had spontaneous recall of intraoperative events. However, patients were able to make correct inclusion-exclusion decisions (*i.e.*, patients had higher hit rates in the inclusion part of the test compared with base rate performance, and, in the exclusion part, hit rates were lower). These results indicate that explicit memory is not synonymous with conscious recall and, indeed, can occur in the absence of it.

### ■ *In Vitro* Study of Nonimmunologic Mast Cell Activation. Veien *et al.* (page 1074)

Veien *et al.* used human cutaneous mast cells isolated
